# Supplementary material for: Near-chromosome level genome assembly of the fruit pest Drosophila suzukii using long-read sequencing
Source: PubMed Central journal article supplement (PMC7343843; doi:10.1038/s41598-020-67373-z), 2020-07-08
Supplement: 41598_2020_67373_MOESM1_ESM.pdf [file 41598_2020_67373_MOESM1_ESM.pdf]

## Supplementary Figures

### Near-chromosome level genome assembly of the fruit pest *Drosophila suzukii* using long-read sequencing

Mathilde Paris<sup>1,2</sup>, Roxane Boyer<sup>1,3</sup>, Rita Jaenichen<sup>4</sup>, Jochen Wolf<sup>4,5</sup>, Marianthi Karageorgi<sup>1,6</sup>, Jack Green<sup>1</sup>, Mathilde Cagnon<sup>4</sup>, Hugues Parinello<sup>7</sup>, Arnaud Estoup<sup>8</sup>, Mathieu Gautier<sup>8,\*</sup>, Nicolas Gompel<sup>4,\*</sup>, Benjamin Prud'homme<sup>1,\*</sup>

<sup>1</sup> Aix-Marseille Université, CNRS, IBDM, Institut de Biologie du Développement de Marseille, 13288 Marseille Cedex 9, France

<sup>2</sup> present address: IGFL, Institut de Génomique Fonctionnelle de Lyon, Université de Lyon, Ecole Normale Supérieure de Lyon, CNRS, Université Claude Bernard Lyon 1, UMR 5242, 69364 Cedex 07, Lyon, France.

<sup>3</sup> present address: INRA, US 1426, GeT-PlaGe, Genotoul, Castanet-Tolosan, France

<sup>4</sup> Ludwig-Maximilians Universität München, Fakultät für Biologie, Biozentrum, Grosshaderner Strasse 2, 82152 Planegg-Martinsried, Germany

<sup>5</sup> Department of Ecology and Genetics, Evolutionary Biology Centre, Uppsala University, Norbyvägen 14-18, 75236, Uppsala, Sweden

<sup>6</sup> present address: Department of Integrative Biology, University of California, Berkeley, CA, USA

<sup>7</sup> MGX, MGX, Biocampus Montpellier, CNRS, INSERM, Univ Montpellier, Montpellier, France

<sup>8</sup> CBGP, INRA, CIRAD, IRD, Montpellier SupAgro, Univ Montpellier, Montpellier, France

\* co-corresponding authors

## BUSCO Assessment results

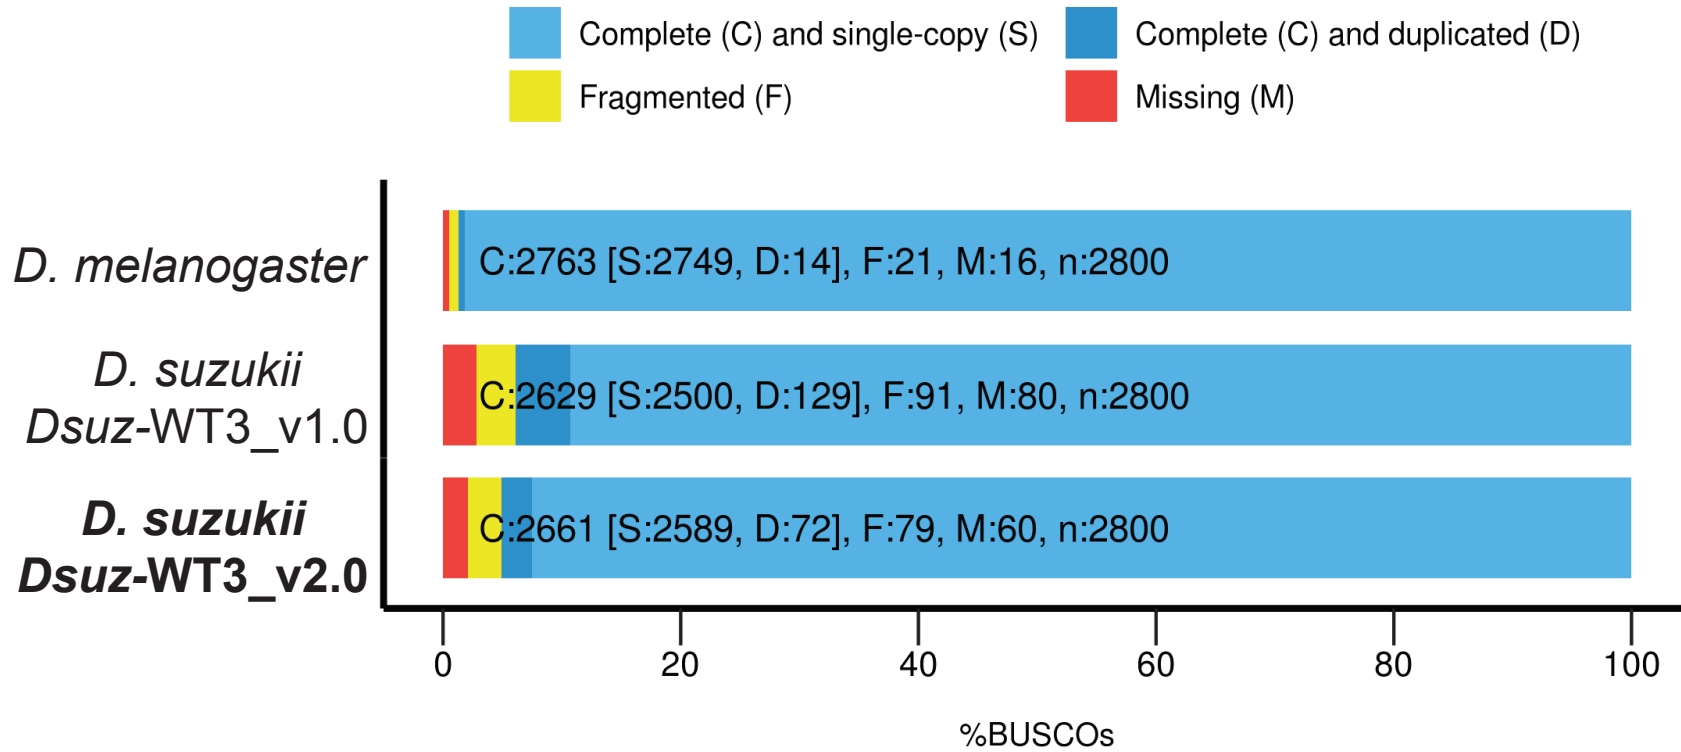

Figure S1

Figure S1: BUSCO statistics for the different assembly steps.

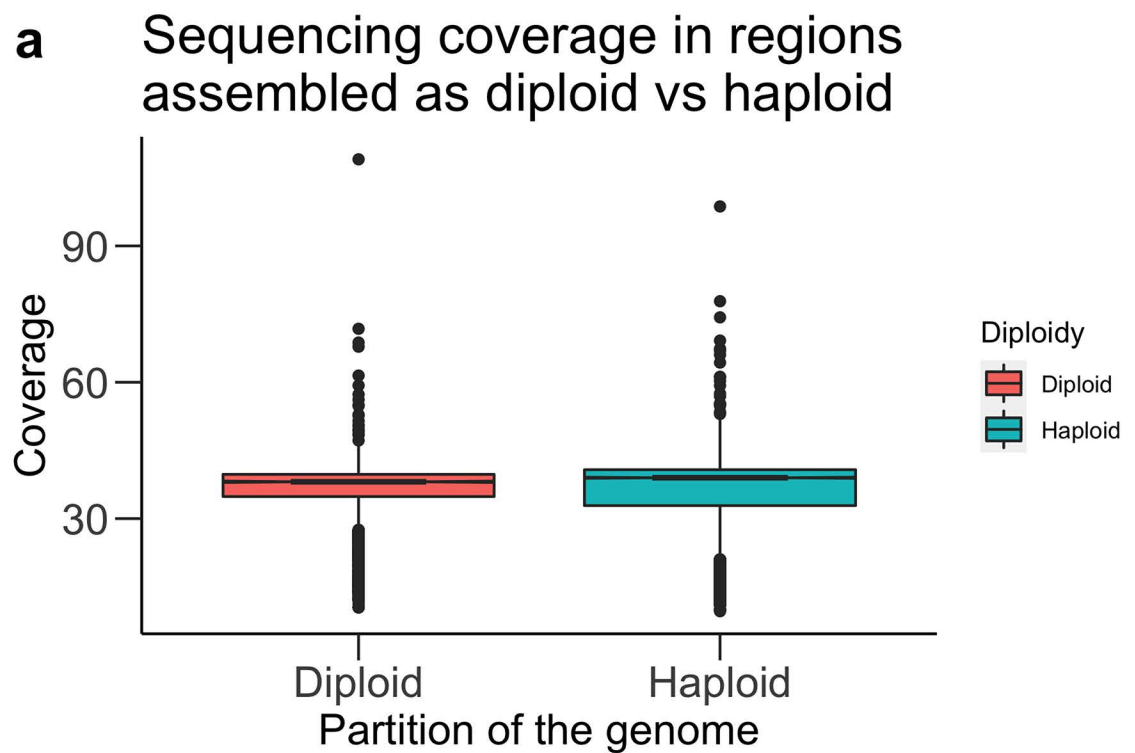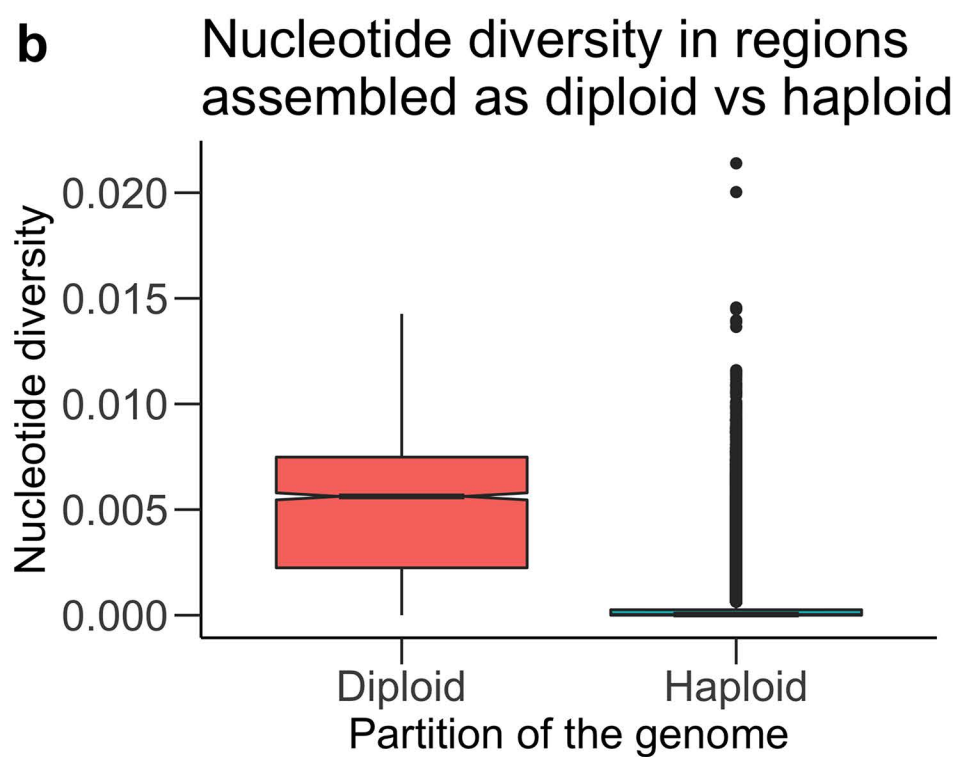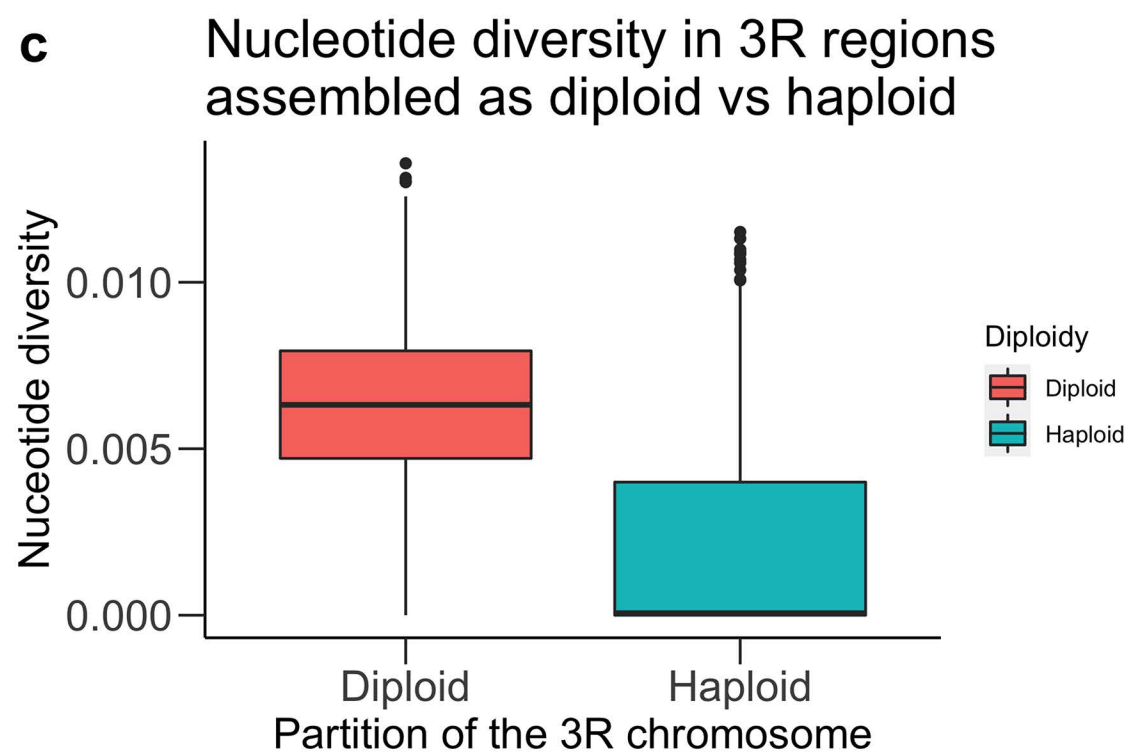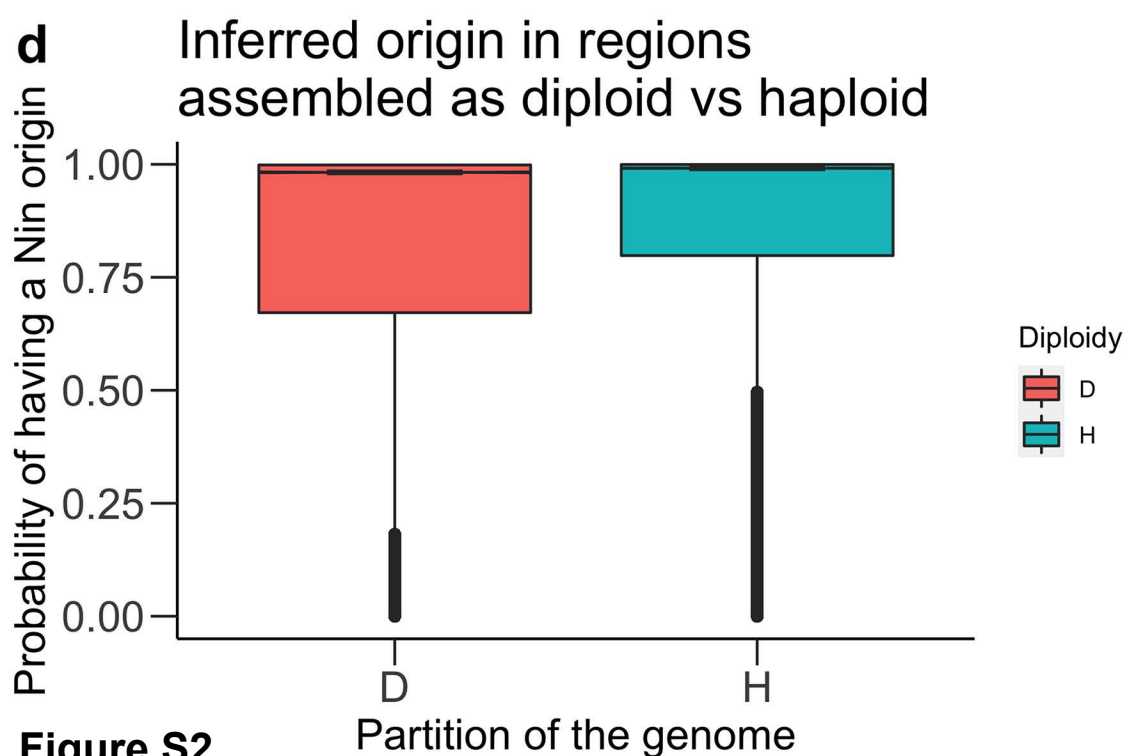

**Figure S2**

Figure S2: Comparison of coverage (**A**) and nucleotide diversity (**B**) between regions for which an alternative sequence was assembled (« Diploid ») and the rest of the genome (« Haploid »). Reads from the Dsuz-WT3\_v2.0 Pool-seq sample were used and mean coverage was calculated on 10 kb windows. (**C**) Same analysis than in (**B**) for the contigs associated with chromosomal arm 3 only. (**D**) Probability of being of population CN-NIN (Ningbo, China) origin for SNPs located within either the diploid or the haploid regions of the genome. A value close to 1 means that the SNP is predicted as being in a genomic region of CN-NIN origin and a value close to 0 means that the SNP is predicted as being in a region of alternative populational origin (*i.e.*, US-Haw for Hawaii – USA).

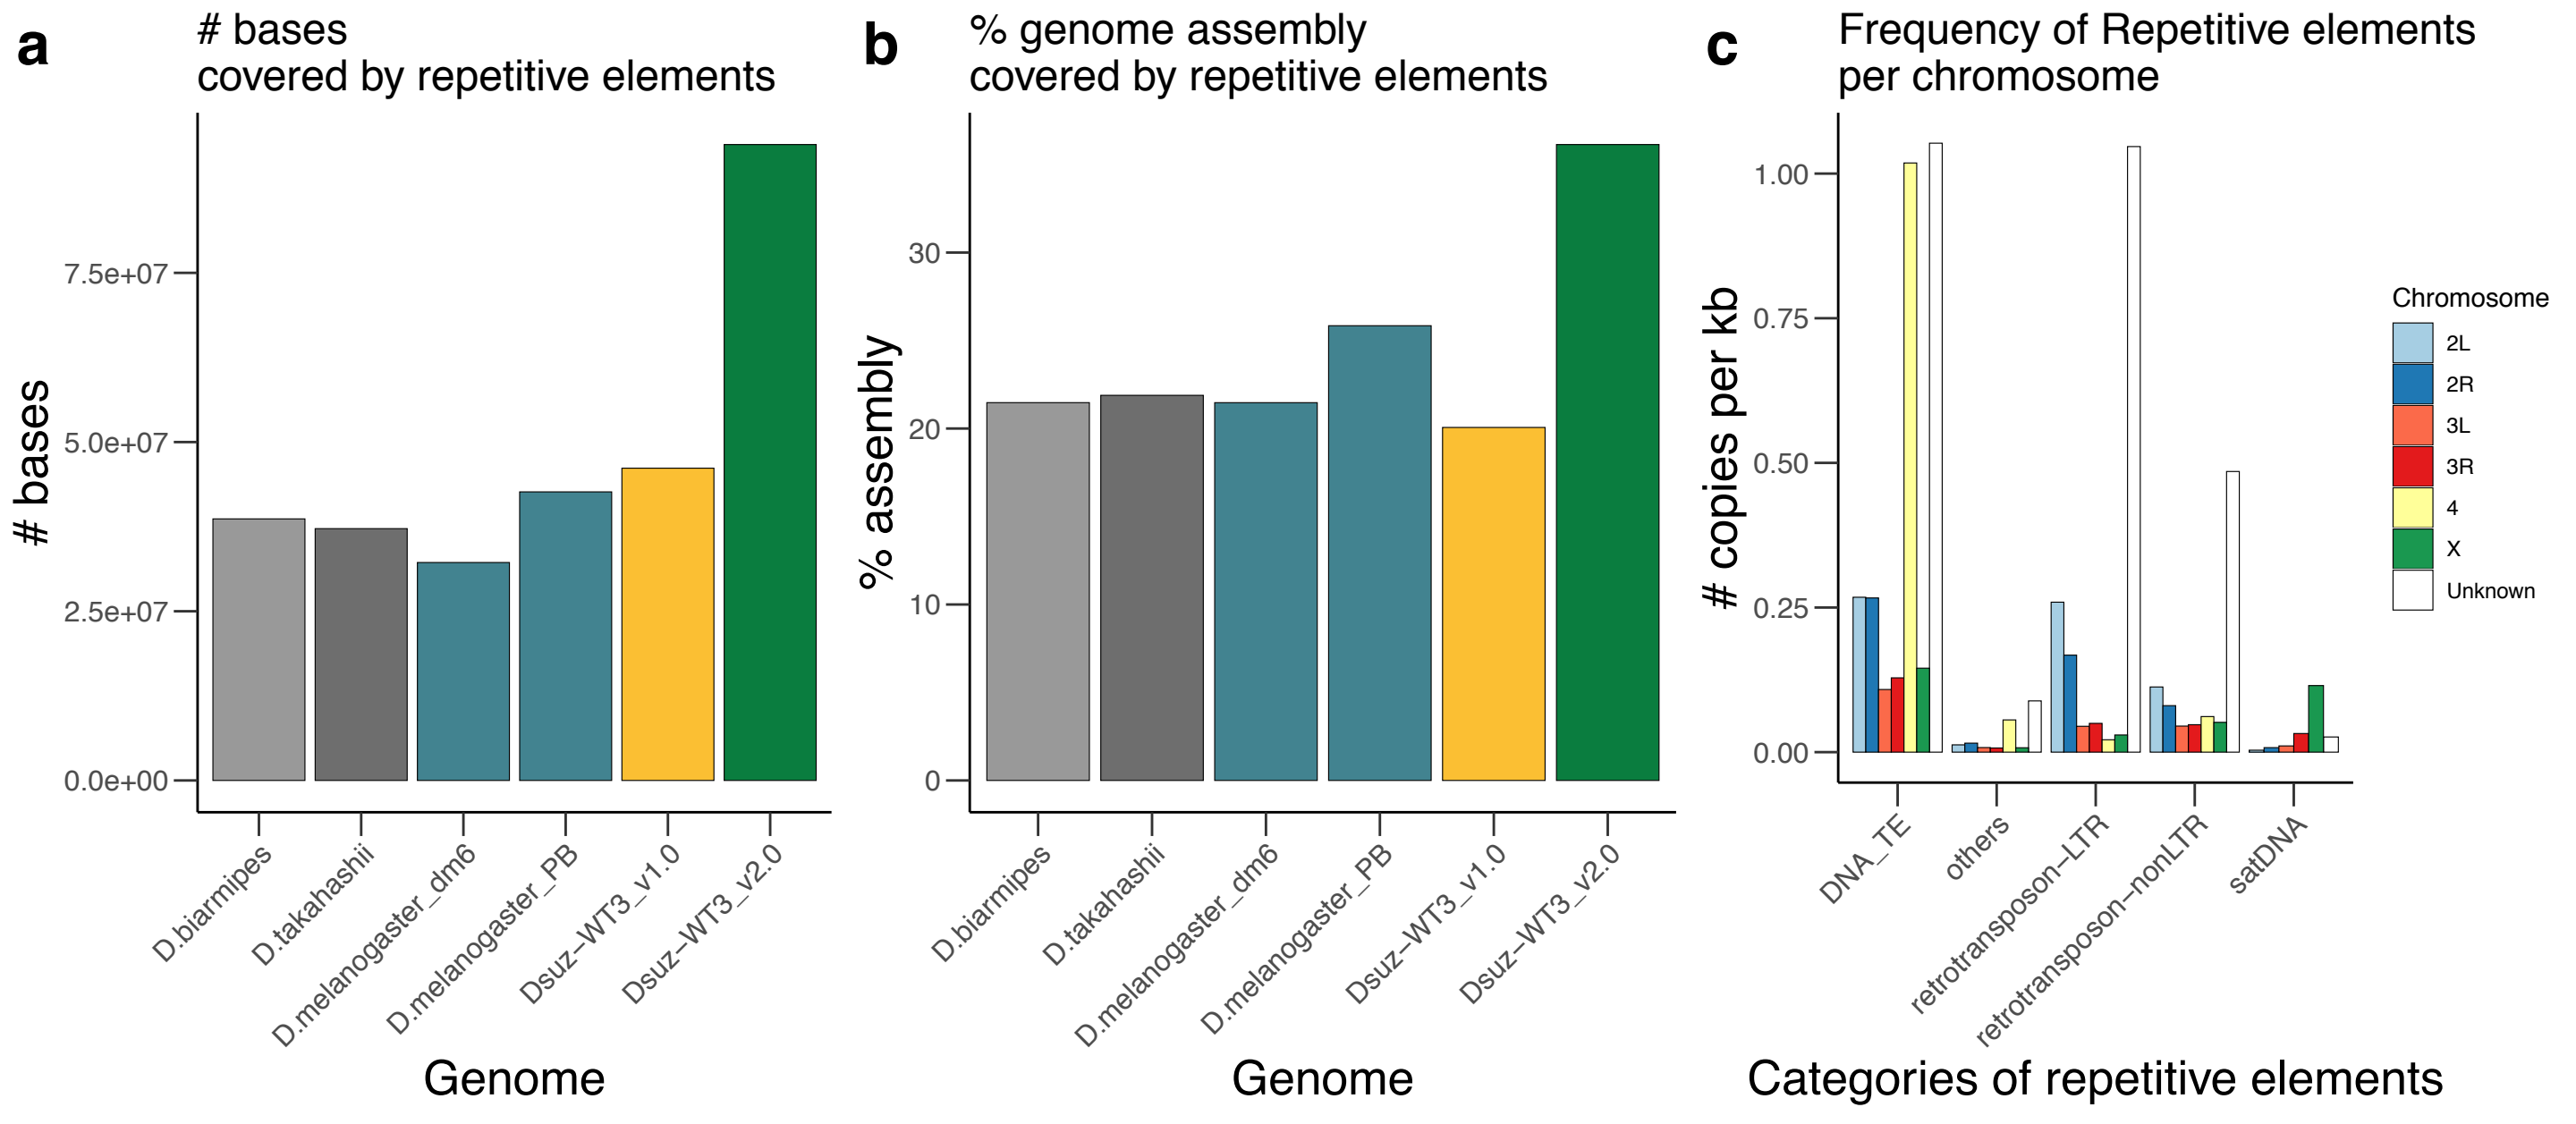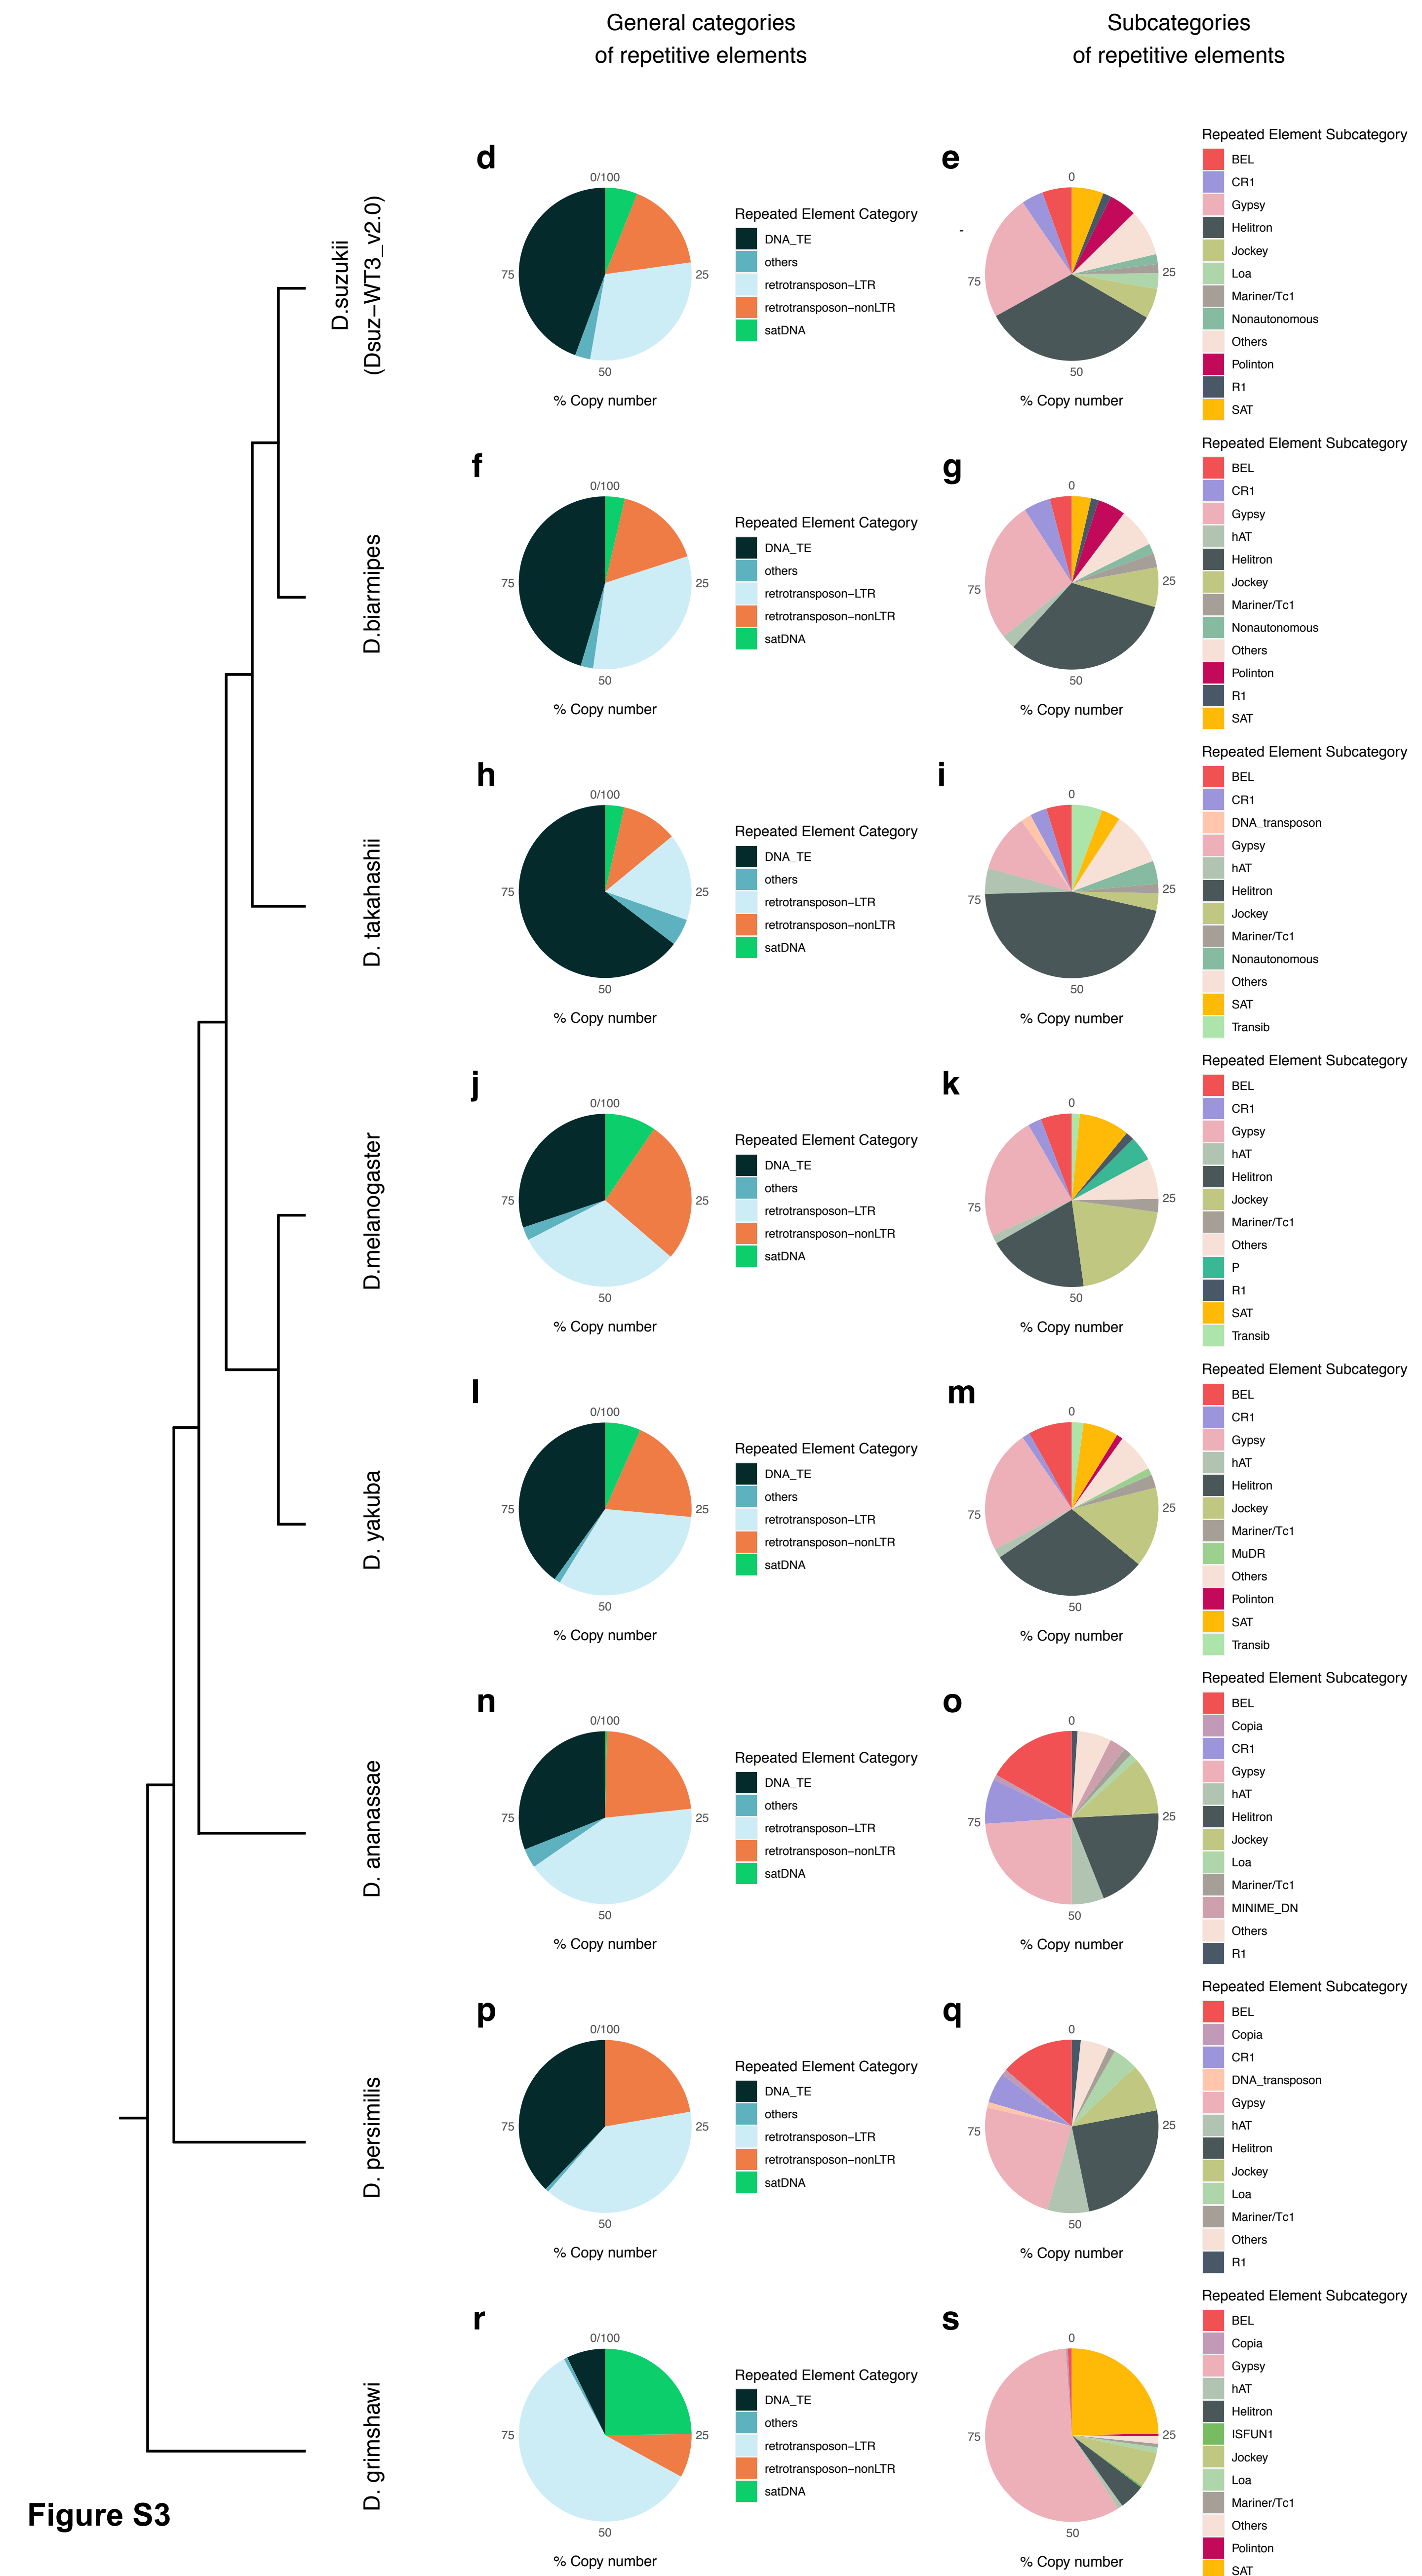

**Figure S3**

Figure S3: Comparison of the repetitive sequences repertoire between *D. suzukii*, and other *Drosophila* species. Comparison of (A) the number of bases and (B) the percentage of the genome assembly covered by repetitive elements in *D. suzukii*, *D. melanogaster*, *D. biarmipes* and *D. takahashii*. Two assemblies were used for *D. suzukii* (Dsuz-WT3-v1.0 and Dsuz-WT3\_v2.0) and for *D. melanogaster* (dm6 and an assembly done using PacBio (PB) reads), (C) Chromosomal distribution of broad categories of repetitive elements in Dsuz-WT3\_v2.0 (D-S) The number of copies of each type of repetitive elements was compared in *D. suzukii*, *D. melanogaster*, *D. biarmipes*, *D. takahashii*, *D. yakuba*, *D. ananassae*, *D. persimilis* and *D. grimshawi* for broad categories (D, F, H, J, L, N, P and R) and more specific categories (C, E, G, I, K, M, O, Q and S) of repetitive elements. Species phylogeny is indicated.

# alpha value per chromosome in Dsuz-WT3\_v2.0

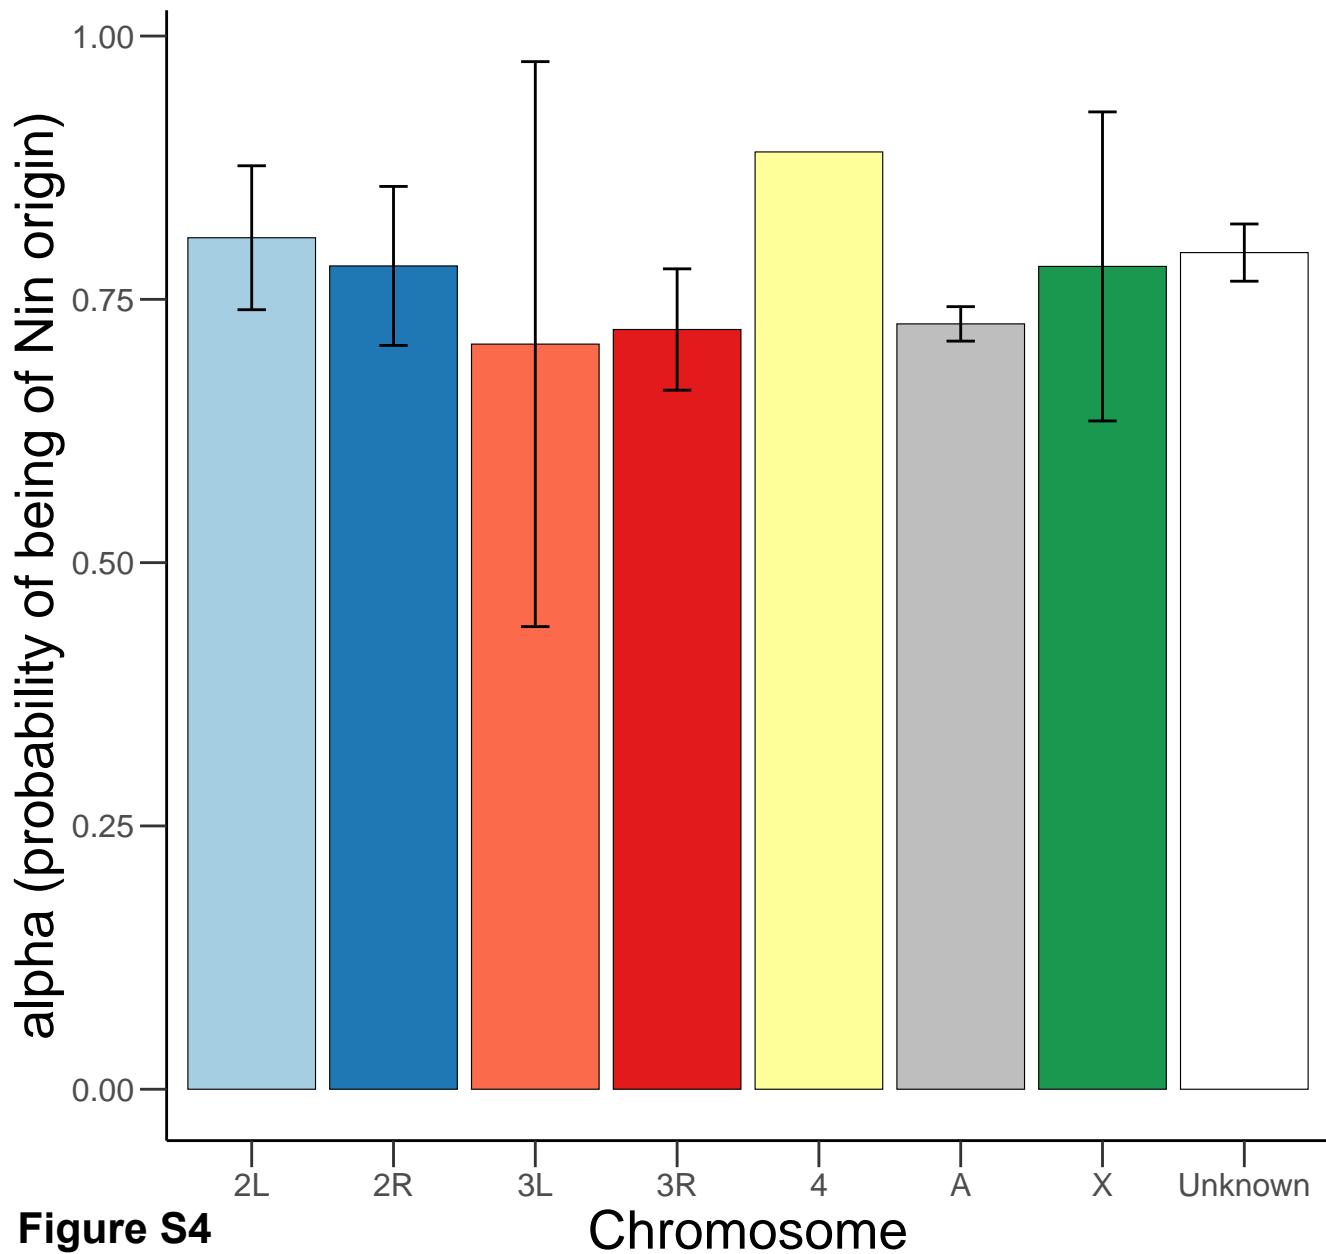

Figure S4

Chromosome



Figure S4: Chromosomal distribution of alpha, the probability of being of population CN-NIN (Ningbo, China). Values correspond to the relative length proportion of each contig with a Nin origin. “2L”, “2R”, “3L”, “3R”, “4”, “X”: assigned *D. melanogaster* chromosome for each Dsuz-WT3\_v2.0 contigs. “A”: autosomal contigs with no clear corresponding *D. melanogaster* chromosome. “Unknown”: contigs for which chromosomal features (i.e., assignment to autosomal or X chromosomes and to *D. melanogaster* chromosome arm) remain unknown. Error bars correspond to S.E.M.

**a**  
**Enrichment of nearly identical neighboring exons  
in polymorphic regions of Dsuz-WT3\_v1.0**

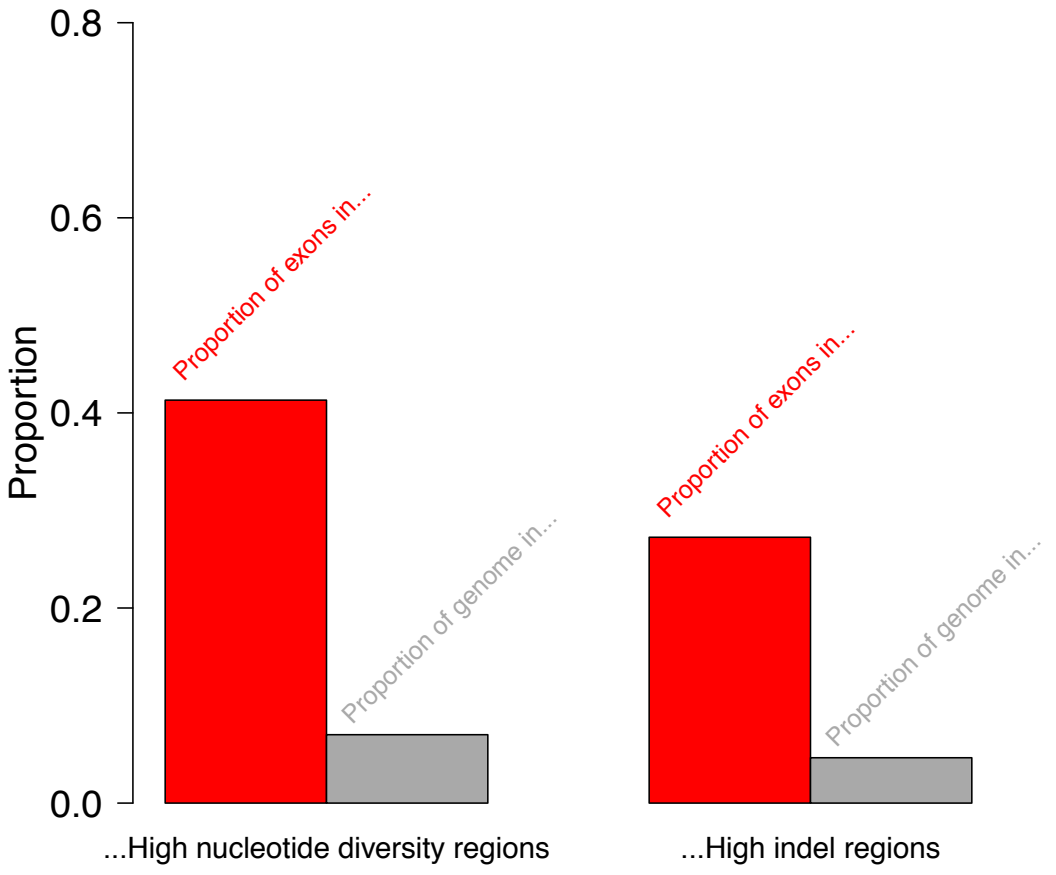

**b**  
**Chromosome distribution of  
nearly identical neighboring exons of Dsuz-WT3\_v1.0**

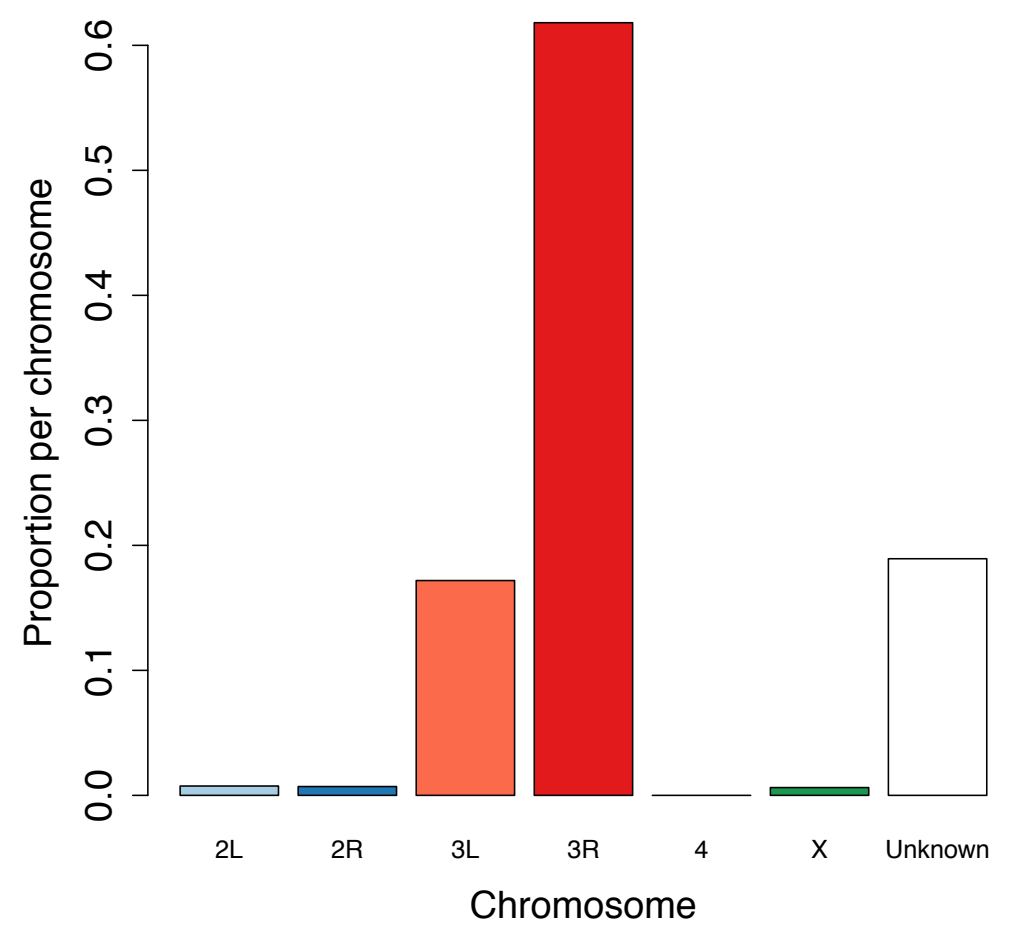

**Figure S5**

Figure S5: Nearly identical neighboring exons of Dsuz-WT3\_v1.0 map to Dsuz-WT3\_v2.0 regions of high nucleotide diversity and to *D. melanogaster* chromosomal arms 3R and 3L. We aligned the Dsuz-WT3\_v1.0 assembly to the Dsuz-WT3\_v2.0 assembly and dm6 and determined the location of the nearly identical neighboring exons of Dsuz-WT3\_v1.0 relative to the regions of Dsuz-WT3\_v2.0 high nucleotide diversity as a proxy (underestimate) of nucleotide diversity in Dsuz-WT3\_v1.0. **(a)** In red, Proportion of the nearly identical neighboring exons in regions of high nucleotide diversity (~19Mb) or high indel rates (~12Mb). For comparison, the proportion of those regions in the Dsuz-WT3\_v2.0 assembly is indicated in grey. Those exons are *ca.* 6 fold more abundant than expected, Fisher's test p.value <  $2.2 \times 10^{-16}$ . **(b)** Alignment of the Dsuz-WT3\_v1.0 nearly identical neighboring exons on *D. melanogaster* chromosomes. "2L", "2R", "3L", "3R", "4", "X": assigned *D. melanogaster* chromosome for each Dsuz-WT3\_v1.0 contigs. "Unknown": contigs for which chromosomal features (i.e., assignment to *D. melanogaster* chromosome arm) remain unknown.

Table S1: Descriptive statistics of the *D. sukii* assemblies Dsuz-WT3\_v2.0 and Dsuz-WT3\_v1.0, and of the *D. melanogaster* assembly dm6.

Table S2: Gene orthology table based on genome alignment between Dsuz-WT3\_v2.0, Dsuz-WT3\_v1.0 (Chiu et al., 2013) and *D. melanogaster* r6.03.

Table S3: Chromosome association and summary statistics per Contig.

Chromosome association was based on (i) sequence similarity + synteny with the *D. melanogaster* genome assembly and (ii) sex ratio of reads issued from a female or a male. 2R, 2L, 3R, 3L, 4, X are chromosome names. "A": Autosome. NA: no assignation could be made. Contigs with no estimation of alpha did not have enough SNPs associated. alpha represents an estimation of the mean fraction of the assembled genome with a Ningbo origin. rho is a parameter of the HMM model and could be described as "recombination" rate between ancestral populations. See Supplementary File S2 for further details.
